# 1 Population-based sequencing of *Mycobacterium tuberculosis* reveals how 2 current population dynamics are shaped by past epidemics

3 Irving Cancino-Muñoz<sup>1,\*</sup>, Mariana G. López<sup>1,\*</sup>, Manuela Torres-Puente<sup>1</sup>, Luis M.  
4 Villamayor<sup>2</sup>, Rafael Borrás<sup>3</sup>, María Borrás-Mañez<sup>4</sup>, Montserrat Bosque<sup>5</sup>, Juan J.  
5 Camarena<sup>6</sup>, Caroline Colijn<sup>7</sup>, Ester Colomer-Roig<sup>2,6</sup>, Javier Colomina<sup>3</sup>, Isabel Escribano<sup>8</sup>,  
6 Oscar Esparcia-Rodríguez<sup>9</sup>, Francisco García-García<sup>10</sup>, Ana Gil-Brusola<sup>11</sup>, Concepción  
7 Gimeno<sup>12</sup>, Adelina Gimeno-Gascón<sup>13</sup>, Bárbara Gomila-Sard<sup>14</sup>, Daminana González-  
8 Granda<sup>15</sup>, Nieves Gonzalo-Jiménez<sup>16</sup>, María Remedio Guna-Serrano<sup>12</sup>, José Luis López-  
9 Hontangas<sup>11</sup>, Coral Martín-González<sup>17</sup>, Rosario Moreno-Muñoz<sup>14</sup>, David Navarro<sup>3</sup>, María  
10 Navarro<sup>18</sup>, Nieves Orta<sup>19</sup>, Elvira Pérez<sup>20</sup>, Josep Prat<sup>21</sup>, Juan Carlos Rodríguez<sup>13</sup>, Ma.  
11 Montserrat Ruiz-García<sup>16</sup>, Hermelinda Vanaclocha<sup>20</sup>, Valencia Region Tuberculosis  
12 Working Group, Iñaki Comas<sup>1,22,†</sup>

13 <sup>1</sup>Tuberculosis Genomics Unit, Instituto de Biomedicina de Valencia (IBV-CSIC), 46010  
14 Valencia, Spain

15 <sup>2</sup>Unidad Mixta “Infección y Salud Pública” (FISABIO-CSISP), 46020 Valencia, Spain

16 <sup>3</sup>Microbiology Service, Hospital Clínico Universitario, 46010 Valencia, Spain

17 <sup>4</sup>Microbiology and Parasitology Service, Hospital Universitario de La Ribera, 46600  
18 Alzira, Spain

19 <sup>5</sup>Microbiology Service, Hospital Arnau de Vilanova, 46015 Valencia, Spain

20 <sup>6</sup>Microbiology Service, Hospital Universitario Dr. Peset, 46017 Valencia, Spain

21 <sup>7</sup>Department of Mathematics, Faculty of Science, Simon Fraser University, V5A 1S6 BC,  
22 Canada

23 <sup>8</sup>Microbiology Laboratory, Hospital Virgen de los Lirios, 03804 Alcoy, Spain

24 <sup>9</sup>Microbiology Service, Hospital de Denia, 03700 Denia, Spain

25 <sup>10</sup>Bioinformatics and Biostatistics Unit, Centro de Investigaciones Príncipe Felipe, 46012  
26 Valencia, Spain

27 <sup>11</sup>Microbiology Service, Hospital Universitari i Politècnic La Fe, 46026 Valencia, Spain

28 <sup>12</sup>Microbiology Service, Hospital General Universitario de Valencia, 46014 Valencia,  
29 Spain

30 <sup>13</sup>Microbiology Service, Hospital General Universitario de Alicante, 03010 Alicante, Spain

31 <sup>14</sup>Microbiology Service, Hospital General Universitario de Castellón, 12004 Castellón,  
32 Spain

33 <sup>15</sup>Microbiology Service, Hospital Lluís Alcanyis, 46800 Xativa, Spain

34 <sup>16</sup>Microbiology Service, Hospital General Universitario de Elche, 03203 Elche, Spain

35 <sup>17</sup>Microbiology Service, Hospital Universitario de San Juan de Alicante, 03550 Alicante,  
36 Spain

37 <sup>18</sup>Microbiology Service, Hospital de la Vega Baja, 03314 Orihuela, Spain

38 <sup>19</sup>Microbiology Service, Hospital San Francesc de Borja, 46702 Gandía, Spain

39 <sup>20</sup>Subdirección General de Epidemiología y Vigilancia de la Salud y Sanidad Ambiental  
40 de Valencia (DGSP), 46020 Valencia, Spain

41 <sup>21</sup>Microbiology Service, Hospital de Sagunto, 46520 Sagunto, Spain

42 <sup>22</sup>CIBER of Epidemiology and Public Health (CIBERESP), Madrid, Spain

43 \*I. C-M and M.G.L contributed equally to this work

44 †corresponding authors:

45 Mariana Gabriela López. Instituto de Biomedicina de Valencia, Calle Jaume Roig 11,  
46 46010, Valencia, Spain. (+34) 96 339 17 60. **Email:** [mglopez@ibv.csic.es](mailto:mglopez@ibv.csic.es),  
47 [mglopez76@gmail](mailto:mglopez76@gmail)

48 Iñaki Comas. Instituto de Biomedicina de Valencia, Calle Jaume Roig 11, 46010,  
49 Valencia, Spain. (+34) 96 339 17 60. **Email:** [icomas@ibv.csic.es](mailto:icomas@ibv.csic.es)

## 50 **Valencia Region Tuberculosis Working Group**

51 <sup>14</sup>Manuel Belda-Álvarez,

52 <sup>14</sup>Aurora Blasco,

53 <sup>13</sup>Avelina Chinchilla-Rodríguez,

54 <sup>3</sup>Ma. Angeles Clari,

55 <sup>4</sup>Olalla Martínez-Macías,

56 <sup>13</sup>Rafael Medina-González,

57 <sup>14</sup>Fernando Mora-Remón,

58 **Keywords:** Tuberculosis, transmission, genomic epidemiology, whole-genome  
59 sequencing

60 **This PDF file includes:**

61 Main Text

62 Figures 1 to 4

63 Tables 1

64 **Abstract**

65 **Background.** Transmission has been proposed as a driver of tuberculosis (TB)  
66 epidemics in high-burden regions, with negligible impact in low-burden areas. Genomic  
67 epidemiology can greatly help to quantify transmission in different settings but the lack of  
68 whole genome sequencing population-based studies has hampered its use to compare  
69 transmission dynamics and contribution across settings.

70 **Methods.** We generated an additional population-based sequencing dataset from  
71 Valencia Region, a low burden setting, and compared it with available datasets from  
72 different TB settings to reveal heterogeneity of transmission dynamics and its public  
73 health implications. We sequenced the whole genome of 785 *M. tuberculosis* strains and  
74 linked genomes to patient epidemiological data. We applied a pairwise distance  
75 clustering approach and phylodynamics methods to characterize transmission events  
76 over the last 150 years, in Valencia, Spain (low burden), Oxfordshire, United Kingdom  
77 (low burden) and a high-burden (Karonga, Malawi).

78 **Results.** Our results revealed high local transmission in the Valencia Region (47.4%  
79 clustering), in contrast to Oxfordshire (27% clustering), and similar to a high-burden  
80 setting like Malawi (49.8% clustering). By modelling times of the transmission events, we  
81 observed that settings with high transmission are associated with uninterrupted  
82 transmission of strains over decades, irrespective of burden.

83 **Conclusions.** Our results underscore significant differences in transmission between TB  
84 settings even with similar burdens, reveal the role of past epidemic in on-going TB  
85 epidemic and highlight the need for in-depth characterization of transmission dynamics  
86 and specifically-tailored TB control strategies.

87 **Funding.** European Research Council under the European Union's Horizon 2020  
88 research and innovation program (Grants 638553-TB-ACCELERATE, 101001038-TB-  
89 RECONNECT), and Ministerio de Ciencia e Innovación (Spanish Government,  
90 SAF2016-77346-R and PID2019-104477RB-I00)

## 91 Main Text

### 92 Introduction

93 Tuberculosis (TB) is one of the top 10 most deadly infectious diseases according to the  
94 World Health Organization (WHO). In 2019 were reported 10 million new TB cases and  
95 1.4 million deaths, with these numbers likely to increase due to the COVID-19 pandemic  
96 (Glaziou, 2020). Recognizing heterogeneity across settings in the population-level  
97 dynamics of tuberculosis is key to advance to new stages in local and global TB control  
98 (Mathema et al., 2017). Recent transmission significantly contributes to the global TB-  
99 burden mostly in the high incidence regions and its control is imperative to achieve the  
100 goal of the End TB Strategy (Guerra-Assunção et al., 2015; “The transmission of  
101 *Mycobacterium tuberculosis* in high burden settings,” 2016). On the contrary, in many  
102 countries close to the pre-elimination phase (<5/100,000 cases) ongoing transmission  
103 plays a minor role and control strategies focused on latent TB infection (LTBI) mostly  
104 from imported cases (Menzies et al., 2018). However, whether burden can be used as a  
105 proxy of recent transmission is not clear and understanding transmission dynamics for  
106 each country is key for tailor-made strategies.

107 Measuring transmission is still challenging, it can be achieved by comparing the  
108 pathogen genomes of culture positive cases with some limitations, for example all  
109 transmission cases associated with LTBI or those with negative culture cannot be  
110 analyzed. However, it allows us to compare transmission clustering rates across  
111 countries in a standard way. Whole-genome sequencing (WGS) represents a widely  
112 applied tool in the study of TB epidemiology and transmission based on the pairwise  
113 single nucleotide polymorphisms (SNPs) distance (Gardy et al., 2011; “Whole-genome  
114 sequencing to delineate *Mycobacterium tuberculosis* outbreaks: a retrospective  
115 observational study,” 2013). WGS displays higher resolution, provides accurate results

116 tracking recent transmission (“Aiming for zero tuberculosis transmission in low-burden  
117 countries,” 2017, “Role and value of whole genome sequencing in studying tuberculosis  
118 transmission,” 2019; Jajou et al., 2018; Meehan et al., 2019) and reports greater  
119 agreement with epidemiological results (Nikolayevskyy et al., 2016; Roetzer et al.,  
120 2013). Despite WGS reliability, there exists controversy regarding the SNP threshold  
121 employed to delineate genomic clusters. A cut-off of 5 SNPs has been widely accepted  
122 for the clustering of recently linked cases (Meehan et al., 2019; “Role and value of whole  
123 genome sequencing in studying tuberculosis transmission,” 2019) while an upper value  
124 of 12 SNPs also incorporates older transmission events (“Whole-genome sequencing to  
125 delineate Mycobacterium tuberculosis outbreaks: a retrospective observational study,”  
126 2013); however, the extent to which the identification of those cases can aid  
127 epidemiological investigations remains controversial (Bjorn-Mortensen et al., 2016; Jajou  
128 et al., 2018). It is also unclear the extent to which those cutoffs apply to all settings given  
129 differences in social, host and pathogen factors across settings. Even if universal,  
130 understanding transmission dynamics goes beyond recent transmission events, which  
131 have an actionable value for public health, but that do not capture the long-term  
132 dynamics in a population.

133 The lack of WGS studies at the population level represents the main limitation to the  
134 validation of these thresholds across clinical settings and to understand the transmission  
135 dynamics in different settings. Here we use available datasets from a low burden setting  
136 (Oxfordshire, incidence 8.4 cases per 100,000) and from a high burden setting (Malawi,  
137 incidence 87 cases per 100,000) and compare to a newly generated dataset.

138 Spain is a low-incidence country (9.3/100,000) where the contribution of recent  
139 transmission to local TB burden remains largely unknown. We applied WGS to  
140 investigate the epidemiology and dynamics of TB transmission in the Valencia Region,

141 the fourth most populated region of the country, over three years, and evaluated the  
142 general use of an SNP threshold in cluster definition in this particular setting. Compared  
143 with similar population-based studies from locations with different TB burdens (Guerra-  
144 Assunção et al., 2015; Walker et al., 2014), transmission in Valencia has a prominent  
145 role in the current epidemics, with a genomic clustering rate higher than the other low-  
146 burden and closer to high-burden settings. Furthermore, our results demonstrate that  
147 current TB incidence in Valencia and Malawi mainly derives from sustained transmission  
148 over time, with the majority of the linked cases currently observed coming from long-term  
149 transmission chains established around 30 years ago.

## 150 **Results**

### 151 ***M. tuberculosis* population structure and demographic characteristics in Valencia**

#### 152 **Region**

153 We sequenced 77% of the TB culture-positive cases reported between 2014-2016 in  
154 Valencia Region (Supplemental Table 1). 10 samples were removed as non-MTBC  
155 isolates or likely mixed infections (Supplemental figure 1). We identified 6 different  
156 lineages(L) circulating in the region (Coll et al., 2014; Stucki et al., 2016), with L4 the  
157 most frequent (92.1%) (Figure 1A).

158 Characteristics of TB cases are summarized in Supplemental Table 2, reporting the  
159 sequenced samples as a representative subset of the total culture-positive cases.  
160 Detailed epidemiological analysis is presented in Supplemental Table 3, remarkably  
161 63% of all cases were Spanish-born patients, while 30% came from high-incidence  
162 countries and 7% from other low-incidence countries. 14% of residents are foreign-born,  
163 thereby accounting for a TB incidence of 23.6 vs. 6.9 cases per 100,000 among  
164 Spanish-born patients. When observed risk factors, we found that 12.4% of patients



165 suffered social exclusion, which was more prevalent among foreign-born patients (OR  
 166 3.1, CI 1.9-5.1,  $p < 0.001$ ). Diabetes was present in 10.4% of cases; although this was  
 167 more prevalent in Spanish-born patients (OR 2.7, CI 1.5-5.4,  $p < 0.001$ ), values were  
 168 similar to disease prevalence in the general population.

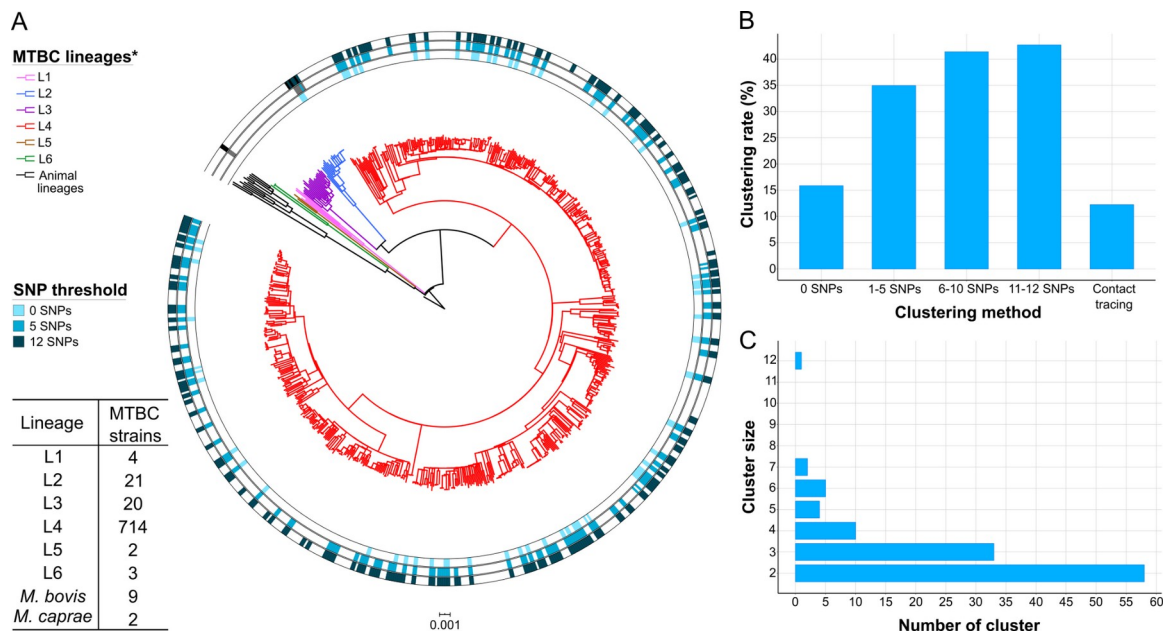

169 **Figure 1. Genomic characterization of the study region. A.** Phylogeny of 775 TB isolates collected  
 170 during 2014-2016. Each ring represents genomic clusters detected by different SNP thresholds (0, 5, 10,  
 171 and 12 SNPs). *M. canneti* was used as an outgroup. **B.** Clustering percentage, i.e. percentage of samples  
 172 within clusters for different SNP thresholds. **C.** Number of genomic clusters by different cluster sizes. A 12-  
 173 SNP threshold was used as a standard. Cluster sizes of 8 to 11 samples were not detected. \*Nomenclature  
 174 proposed by Comas et al. (Comas et al., 2013).

## 175 Epidemiological and genomic clustering

176 Classic contact tracing identified 66 epidemiological clusters, including 97 cases,  
 177 accounting for 12.5% of transmission in the Valencia Region (Figure 1B). Spanish-born  
 178 and foreign-born patients equally formed part of an epidemiological cluster. Considering  
 179 a pairwise distance threshold of 12 SNPs, we identified 112 genomic clusters, including  
 180 331 (42.7%) patients, with clusters including from 2 to 12 cases (Figure 1C,

181 Supplemental Table 4). Although these clusters included foreign-born patients, Spanish-  
182 born patients were more likely part of genomically-linked groups (OR 2, CI 1.44-2.79,  
183  $p < 0.001$ ). In this regard, 42 genomic clusters exclusively comprised Spanish-born  
184 patients and 8 included only foreign-born patients. Besides Spanish origin and  
185 pulmonary localization of TB (OR 2.5, CI 1.60-3.98,  $p < 0.005$ ), no social or risk factor  
186 appeared associated with transmission (Supplemental Table 3). In addition, 90% of TB  
187 cases in Valencia Region are susceptible to all antibiotics used in treatment, so  
188 resistance mutations do not have an impact in the clustering.

189 We also assessed genomic clusters considering different SNP thresholds, and observed  
190 that independently of the cut-off considered, the clustering rate obtained by contact  
191 tracing was always lower than the genomic estimates (Figure 1B). A high number of  
192 genomic links were not detected by epidemiological inspection, while some  
193 epidemiological links were not corroborated by any genomic clustering threshold (Figure  
194 2A). Comparison of both approaches revealed that only 15.4% of the 331 patients within  
195 genomic clusters (12 SNPs) had an identified epidemiological link (Supplemental  
196 Results, Supplemental Table 5).

197 We benchmarked WGS as a tool to quantify transmission against contact tracing (Diel et  
198 al., 2019), using the latter as the gold standard (Supplemental Table 6). In general, as  
199 the SNP threshold decreases, sensitivity diminishes, but specificity and accuracy  
200 increase. By a ROC curve, we established 11.5 SNPs as the optimal value for the SNP  
201 cut-off that maximizes the agreement between epidemiological investigation and  
202 genomic data, and genomic clustering appears as an adequate approach to discriminate  
203 transmission, as the area under the curve is higher than 0.9 (Figure 2B). Then, we used  
204 12 SNPs threshold to define clusters in the following analyses.

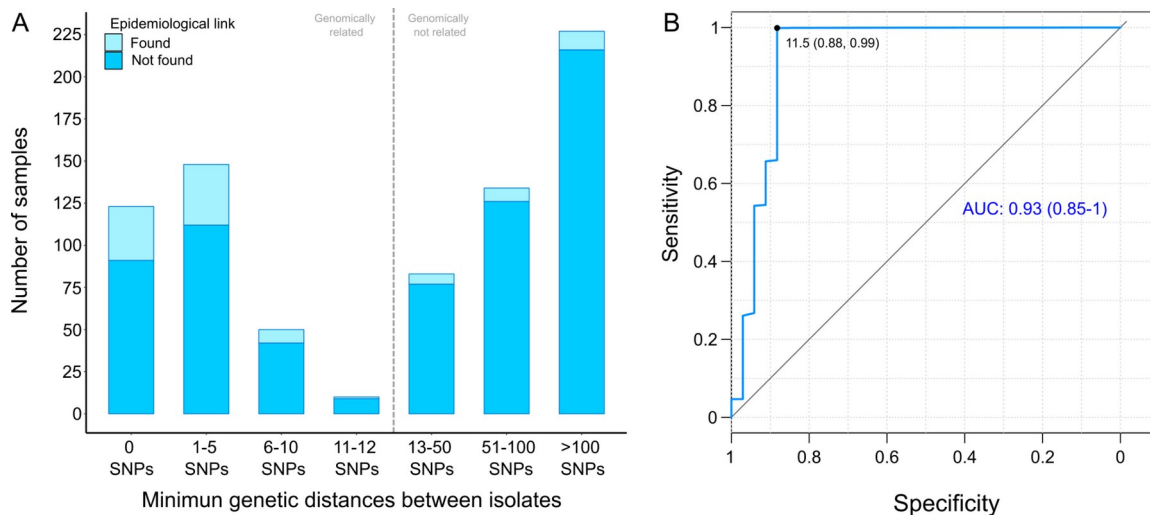

205 **Figure 2. Comparison between epidemiological and genomic clustering.** **A.** Clustered  
206 samples using different pairwise distance thresholds, bars denote the number of cases within  
207 clusters for each SNP threshold. Grey dashed line separates the genomically linked samples  
208 (clustered) from those unlinked. **B.** ROC curve for different pairwise distance thresholds between  
209 0 and 2,000 SNPs, indicating the optimal SNP cut-off values with its correspondent specificity and  
210 sensitivity values, the area under the curve (AUC), and its confidence intervals.

### 211 Genetic thresholds for transmission are not universal across settings

212 We calculated the percentage of Spanish-born cases clustered by a range of pairwise  
213 distances (0-150 SNPs) and compared with the clustering of local cases in other settings  
214 (Guerra-Assunção et al., 2015; Walker et al., 2014), where most of the 70% of all  
215 culture-positive cases were sequenced. We observed a bimodal pattern for Oxfordshire,  
216 with the transmission groups clearly differentiated from the other unlinked cases with  
217 distances higher than 50 SNPs. These findings agree with the 12-SNP value proposed  
218 as a means to identify transmission in datasets from low-burden countries (Walker et al.,  
219 2014). For the Valencia Region and Malawi, strains group in a large range of distance  
220 thresholds (SNPs 0-150). Thus, there exists a continuous clustering throughout the

221 distance values. The results strongly suggest that a strict transmission threshold of 12  
 222 SNPs (or any other threshold) does not apply to all settings, particularly those with  
 223 higher transmission burdens (Figure 3A) and particularly if we want to understand long-  
 224 term transmission dynamics.

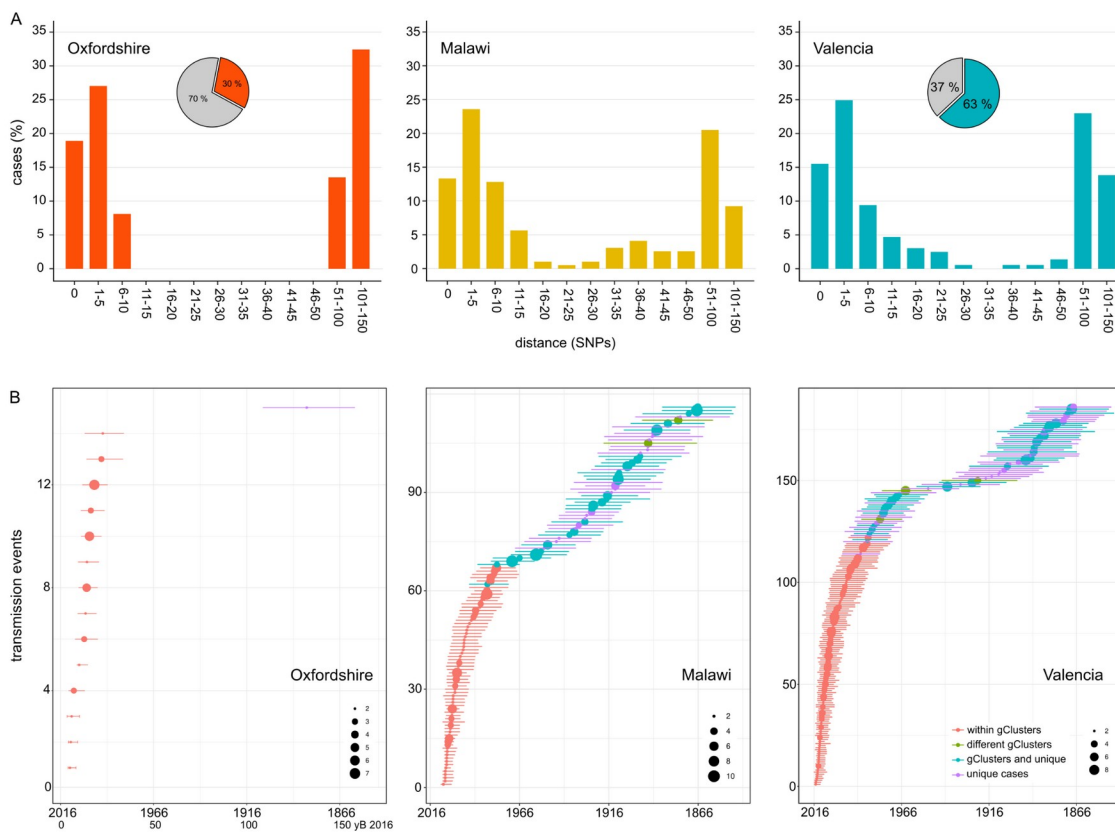

225 **Figure 3. Transmission dynamics analysis. A.** Distribution of Spanish-born cases clustered by  
226 different pairwise distance SNP thresholds. Cases are expressed as the percentage of the plotted  
227 samples. Pie charts represent the proportion of Spanish-born (color) and foreign-born (gray)  
228 cases in each dataset. **B.** Age of local transmission events over time in each setting. Circles  
229 represent median time, and lines 95% high probability density for each transmission event  
230 counted. Circle size represents the number of samples included in the corresponding event. Red  
231 denotes those transmission events including only samples within the same genomic transmission  
232 clusters (gClusters), green denotes events involving samples from different gClusters, blue  
233 denotes samples within gClusters and unique, and purple denotes unique cases.

### 234 **Age of local genomic clusters at different SNP thresholds and impact on public** 235 **health**

236 Next, we evaluated how old are the genomic clusters identified by the standard 12 SNP  
237 threshold. Thus, we inferred the age of the local genomic clusters (gClusters) for the  
238 three settings. Dating results of the youngest and the oldest gClusters are summarized  
239 in Table 1, while complete results are detailed in Supplemental Tables 7-9. We can trace  
240 gClusters 31 years back from the most recent sample collected for both the Valencia  
241 Region and Malawi; however, we only retrieved samples that formed part of gClusters,  
242 19 years before the most recent Oxfordshire sample. The alternative calibration samples  
243 included (Supplemental Methods) displayed similar results, thereby allowing  
244 comparisons among datasets. Thus many gClusters based on 12 SNP thresholds are  
245 beyond the action of public health interventions. In fact, when looking at epidemiological  
246 linked cases in the Valencia Region, most of them have a common ancestor less than  
247 10 years before the most recent sample, and the distance between samples typically  
248 ranged between 0-4 SNPs, with only one cluster separated by 11 SNPs (Supplemental  
249 Table 5). While the ROC curve indicated a 12 SNP threshold to capture most

250 epidemiological links the reality is that strains linked by more than 5 SNP are beyond the  
251 action of public health interventions as they involve too old transmission links. Our  
252 results imply that events useful for public health investigations are better captured by a 5  
253 SNP threshold even though some epidemiological links are missing. But the reverse is  
254 also true, and more dramatic. Even when using a 5 SNP threshold public health only  
255 identifies around 15% of the cases in genomic clusters. This holds true even for pairs of  
256 isolates with 0 SNP differences. As seen in high-burden countries, when transmission  
257 has a prominent role, many transmission events occur outside the traditional household  
258 or work settings.

259 **Table 1. Dating of local genomic clusters (gCluster).** Times of the oldest and youngest local  
260 gClusters obtained by a Bayesian analysis are presented, with values in years (AD) and 95%  
261 highest posterior density given in brackets. The number of gClusters and clustering percentage is  
262 provided for each dataset. The median distance ranges for all gClusters are also detailed.

| Dataset         | Sampling period | Local samples | N local gCluster | Local clustering | Median distance range | Oldest gCluster  | Youngest gCluster |
|-----------------|-----------------|---------------|------------------|------------------|-----------------------|------------------|-------------------|
| Oxfordshire     | 2006-2012       | 74            | 6                | 27%              | 0-7                   | 1993 [1982-2003] | 2009 [2003-2012]  |
| Malawi          | 2008-2010       | 106           | 40               | 49.80%           | 0-14                  | 1979 [1968-1988] | 2009 [2004-2010]  |
| Valencia Region | 2014-2016       | 456           | 65               | 47.40%           | 0-11                  | 1985 [1972-1996] | 2015 [2012-2016]  |

263 **Transmission events over time and between clinical settings highlight distinct**  
264 **epidemic dynamics**

265 In order to evaluate transmission dynamics over time, we traced transmission events  
266 back to 150 years before 2016 (yB 2016) by using genomic data from local-born patients

267 to avoid the influence of imported genotypes. In the case of Oxfordshire, we identified 14  
268 events between 5-25 yB 2016, with the next transmission event being inferred between  
269 100-150 yB 2016 (Figure 3B, Supplemental figure 2, Supplemental Table 10). Thus, a  
270 gap of 75 years occurs between the most recent and the oldest transmission events,  
271 explaining why the 12 SNP threshold performs well in this setting as a transmission  
272 marker. However, even in this setting, genomic transmission clusters defined by a 12  
273 SNP threshold can be traced back to up to 19 years (Table 1), which calls into question  
274 whether the 12 SNPs represent recent transmission in some cases. In the case of  
275 Malawi, we counted 70 events dating back 50 yB 2016 and 46 dated between 50-150 yB  
276 2016 (Figure 3B, Supplemental figure 3, Supplemental Table 11). For the Valencia  
277 Region, we counted 143 events dated back 50 yB 2016 and 43 between 50-150 yB 2016  
278 (Figure 3B, Supplemental figure 4, Supplemental Table 12). The gap detected in  
279 Oxfordshire is not observed in Malawi or Valencia.

280 The sampling of strains that shared a link decades ago in the Valencia Region can be  
281 explained in two ways; that the uninterrupted transmission of those strains until today or  
282 that the cases represent the progression of decades-old (latent) infections. We reasoned  
283 that if old reactivations contribute to strains in the Valencia region sampled during 2014-  
284 2016, we should see an increment in the age of the TB patients belonging to the older  
285 clusters (i.e., patients infected 20 years ago and have reactivated recently). We found no  
286 difference when comparing the age of the patients belonging to a gCluster with the  
287 inferred age of the cluster, (Welch two-samples t-test, p-values > 0.1, Supplemental  
288 figure 5, Supplemental Table 13), suggesting that the strains included in this study do  
289 not represent reactivations, and that uninterrupted transmission is the most likely  
290 explanation for the old links observed.

## 291 Discussion

292 Here, we present the first national population-based study in the Valencia Region. We  
293 sequenced the whole genome of a representative proportion of all the TB notified cases  
294 that provides an accurate picture of the bacterial population structure, during three  
295 years. We exhaustively researched TB transmission linked to local epidemiological data  
296 and, by comparing to other settings, highlighted four main characteristics defining  
297 dynamics and influence on TB incidence.

298 (I) *Transmission can play a significant role in low-burden countries, especially among*  
299 *local-born patients.* The percentage of genomically-linked cases (12 SNPs) of around  
300 43% increases to 47% among the Spanish-born population -being 31% among imported  
301 cases-, suggesting that transmission among locally-born patients majorly contributes to  
302 burden. Percentages remain high when considering a stricter threshold of 5 SNPs for  
303 clustering (35% and 39%, respectively). We found higher transmission in the Valencia  
304 Region when compared to other low-burden settings, where clustering ranged between  
305 14-16% (Jajou et al., 2018; Walker et al., 2014) and somewhat closer to that reported in  
306 high-burden TB countries (39-66%) (Guerra-Assunção et al., 2015; López et al., 2020).  
307 While high transmission burden in Valencia is associated with higher disease incidence  
308 in Spanish-born, reactivation of infections in imported cases from high-burden settings  
309 seem to be the significant drivers in other low-burden settings (Jajou et al., 2018;  
310 Kamper-Jørgensen et al., 2012; Walker et al., 2014). Thus our results highlight the  
311 heterogeneity of the TB epidemic even among countries with similar burden.

312 (II) *Community transmission majorly contributes to transmission burden.* High genomic  
313 clustering suggests that many infections occurred outside the traditional household or  
314 work environment. In high-burden countries, which suffer from rampant community  
315 transmission (“The transmission of *Mycobacterium tuberculosis* in high burden settings,”



316 2016), epidemiological links are only identified in 18% of all genomically-clustered cases  
317 (Yang et al., 2018), a similar value to that observed in Valencia (15.4%), despite contact  
318 tracing occurring in 78% of cases. In those settings, studies have suggested that contact  
319 tracing among close contacts will not have a significant effect on TB incidence at a  
320 community level (McCreesh and White, 2018; Surie et al., n.d.), as transmission  
321 associates more with social drivers (Mathema et al., 2017). This likely explains the lack  
322 of agreement between genomic and epidemiologic clusters observed in the Valencia  
323 Region (62%) compared to other low-burden settings(Diel et al., 2019; Walker et al.,  
324 2014).

325 (III) *Genomic links are older than epidemiological links.* The Valencia Region's oldest  
326 genomic clusters dated to around 30 years before the sampling period. When  
327 considering only strains epidemiologically-linked, the oldest MRCA can be traced less  
328 than 10 years. Thus, a 12 SNP threshold identifies both recent and older transmission  
329 events. A 5 SNP threshold dates clusters between 1999-2015 in agreement with recent  
330 transmission rendering more actionable results for public health. However, a 5 SNP  
331 threshold still misses a percentage of cases linked by epidemiological data and vice  
332 versa, highlighting transmission complexity and the relevance of understanding its  
333 dynamics in each setting. Thus, a strict threshold has limitations and communicating a  
334 range, incorporating degrees of confidence, will be more valuable for public health  
335 interventions. This is particularly true in settings where transmission still has a prominent  
336 role.

337 (IV) *Continuous pairwise genetic distance distributions reflect decades-old transmission*  
338 *chains.* The evaluation of local-born cases in the Valencia Region revealed continuous  
339 clustering across genetic distances, similar to Malawi. In both settings, differentiation

340 between linked and unlinked cases seems arbitrary, as a clear SNP cut-off to delineate  
341 genomic transmission could not provide precise results (Figure 4A). This contrasts with  
342 the results of Oxfordshire, where clustering does not change in the range of 12-150  
343 SNPs (Figure 4B). In this sense, the SNP threshold choice used to differentiate  
344 transmission from unrelated cases remains challenging even in low-burden settings and  
345 provides only tentative information (Meehan et al., 2019). An in-depth evaluation of  
346 clustering is needed to understand the particular transmission dynamics. Furthermore,  
347 the Valencia Region and Malawi also display continuous and sustained transmission  
348 events over time (Figure 4C). Those events outside the genomic transmission clusters  
349 likely reflect older contagion chains that still contribute to TB incidence today, as a  
350 consequence, clustering is continuous in settings exhibiting this transmission dynamics.  
351 The lack of effective past efforts to halt transmission may represent a plausible  
352 explanation. Epidemiological data demonstrates that Spain will likely attain a country  
353 profile similar to the UK and other low-burden, high-immigration countries. The higher  
354 transmission and the older age of transmission chains likely reflects a situation in which  
355 Spain suffered from higher disease incidence for most of the 20<sup>th</sup> century, reflecting its  
356 lower socioeconomic status than neighboring countries. The current control strategies in  
357 place in the Valencia Region meet the WHO's targets to reduce TB, including active  
358 case findings of close contacts since the 1990s. Improve TB control has led to a  
359 continuous drop in case numbers and to an incidence from 22 to 6.4 in the last 20 years.  
360 By contrast, Oxfordshire displays a bimodal distribution of clustering across pairwise  
361 distances, and also lacked transmission events other than those involving 12-SNP  
362 genomic clusters (Figure 4). These results agree with the robust reduction in both  
363 disease incidence and transmission that occurred until the beginning of the 1990s in the  
364 UK; after that, increased HIV infections, immigration and the emergence of TB drug

365 resistance fueled the expansion of the non-eradicated TB (Glaziou et al., 2018). In  
 366 accordance with this data, we dated ongoing transmission in Oxfordshire back to 1993.

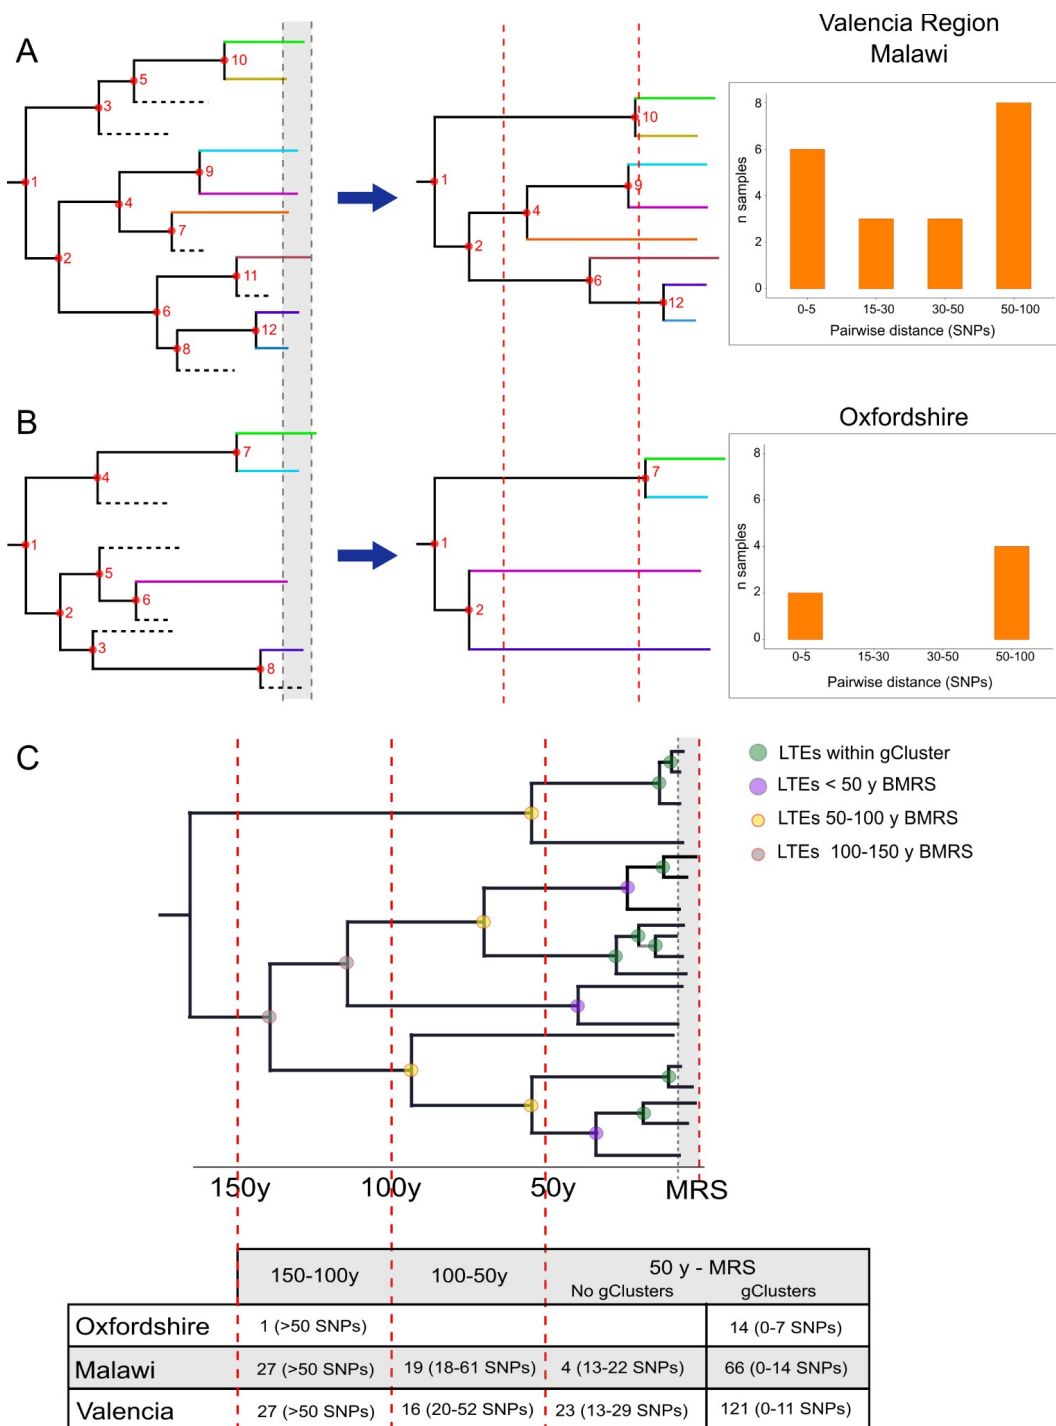

367 **Figure 4. Hypothetical time trees indicating transmission events. A.** (*Left*) The complete  
368 phylogeny, including all bacterial isolates and displaying multiple and sustained transmission  
369 events (nodes), over time. This scenario allows the reconstruction of a tree (*middle*) with several  
370 tips and multiple transmission events. A continuous distribution of clustered cases by different  
371 pairwise distances is retrieved (*right*) as observed in the Valencia Region and Malawi. **B.** A  
372 complete phylogeny (*left*) in which transmission is either too old or recent and few (or no)  
373 transmission events occurred in the middle time, led to the reconstruction of a tree (*middle*) in  
374 which few samples reach the present and fewer nodes are observed all over the tree. This  
375 scenario provides a bimodal distribution of clustered cases by pairwise distance (*right*) as  
376 observed for Oxfordshire. **C.** Time tree with local transmission events (LTEs) over time before the  
377 most recent sample (BMRS). The table (*bottom*) shows the number of events counted in each  
378 time period and the median distance range among the samples within the events for the three  
379 settings analyzed. For the period between the most recent sample (MRS) and 50yBMRS, events  
380 within (gClusters) and outside genomic clusters (No gClusters) are indicated. Vertical red lines  
381 indicate periods of time, horizontal dashed lines indicate missing samples, shaded areas indicate  
382 sampling period, and circles indicate transmission events with colors specified in the legend.

383 The main limitations of our analysis are inherent to the methodology, since only cases  
384 with positive cultures are sequenced. For the Valencia Region, cases included are an  
385 accurate representation of the epidemiological characteristics of the populations under  
386 study. Transmission is oversimplified by considering nodes as transmission events,  
387 while most transmissions will map to branches rather than nodes. However, knowing the  
388 exact timing of transmission is only possible for recent events and a proportion of cases  
389 (Xu et al., 2019), and not relevant for our comparative study which focuses mainly on old  
390 transmission events. Differences in the absolute number of cases in each dataset are  
391 irrelevant for comparison, since they all represent population-based studies with the  
392 same time-window sampling, thus the majority culture positive cases were included in  
393 the analysis. In this sense, the distribution of cases in clusters likely reflects the whole  
394 transmission dynamics of the settings.

395 Our results underscore a primary role for continuous transmission rather than LTBI  
396 reactivation or immigration in fueling TB incidence in the Valencia Region, as occurs in  
397 many high-burden settings (Bjorn-Mortensen et al., 2016; Guerra-Assunção et al., 2015;  
398 López et al., 2020; Yang et al., 2018). The opposite scenario occurs in other low-burden  
399 countries (Jajou et al., 2018; Walker et al., 2014) where transmission is limited and  
400 immigration from high-burden countries, also involving reactivation of the disease,  
401 represents the primary driver of incidence. In addition, reported meta-analysis from  
402 historical epidemiological studies suggests that, contrary to current assumptions, MTB  
403 infection may not be lifelong, and most people are able to clear it (Behr et al., 2019).  
404 This further suggests that the prevalence of LTBI is much lower than assumed, and most  
405 of the TB cases we see today are coming either from recent contagion or imported  
406 depending on the TB setting. Our data highlight how low-burden TB locations can entail  
407 very distinct scenarios that require specifically-tailored management, and that general  
408 TB guidelines should not be applied to all areas based solely on incidence rate  
409 (Lönnroth et al., 2015). Understanding heterogeneities in TB transmission dynamics is  
410 essential to define tailor-made interventions to halt transmission with a population-level  
411 impact, which is key to reducing the incidence of TB worldwide.

## 412 **Materials and Methods**

413 Extended and detailed methods in Supplemental Information

### 414 **Sample selection and study design**

415 1,388 TB cases were reported between 2014-2016 by the Valencian Regional Public  
416 Health Agency (DGSP), 1,019 with positive culture. All the available (785) samples were  
417 collected from 18 regional hospitals (Supplemental figure 1). Demographic, clinical, and

418 microbiological records were obtained from the routine TB surveillance system, for 724  
419 of the total samples. All diagnosed TB-positive patients completed a standardized  
420 questionnaire provided by the DGSP. *M. tuberculosis* structure and clustering analysis  
421 were performed with the total sequences. Epidemiological and transmission dynamics  
422 analysis were carried on with the samples with available information (724).

423 Approval for the study was given by the Ethics Committee for Clinical Research from the  
424 Valencia Regional Public Health Agency (*Comité Ético de Investigación Clínica de la*  
425 *Dirección General de Salud Pública y Centro Superior de Investigación en Salud*  
426 *Pública*). Informed consent was waived on the basis that TB detection forms part of the  
427 regional compulsory surveillance program of communicable diseases. All personal  
428 information was anonymized, and no data allowing patient identification was retained.

#### 429 **DNA extraction and sequencing**

430 Clinical isolates were cultured in Middlebrook 7H11 agar plates supplemented with 10%  
431 OADC (Becton-Dickinson) for three weeks at 37°C. After an inactivation step (90 °C, 15  
432 min), DNA was extracted using the cetyl trimethyl ammonium bromide method from a  
433 representative sample from each patient (four-time plate scraping). All procedures were  
434 conducted in a Biological Safety Level 3 laboratory under WHO protocol  
435 recommendations. Sequencing libraries were constructed with a Nextera XT DNA library  
436 preparation kit (Illumina, San Diego, CA), following the manufacturer's instructions.  
437 Sequencing was performed using the Illumina MiSeq platform.

#### 438 **Bioinformatics Analysis**

439 Data analysis was carried out following a validated previously-described pipeline  
440 ([http://tgu.ibv.csic.es/?page\\_id=1794](http://tgu.ibv.csic.es/?page_id=1794), (Meehan et al., 2019). Sequencing reads were  
441 trimmed with fastp (Chen et al., 2018), and kraken software (Wood and Salzberg, 2014)

442 was then used to remove non-*Mycobacterium tuberculosis* complex (MTBC) reads.  
443 Filtered reads were mapped to an inferred MTBC common ancestor genome  
444 (<https://doi.org/10.5281/zenodo.3497110>) using BWA (Li and Durbin, 2009). SNPs were  
445 called with SAMtools (Li, 2011) and VarScan2 (Koboldt et al., 2012). GATK  
446 HaplotypeCaller (McKenna et al., 2010) was used for calling InDels. SNPs with a  
447 minimum of 10 reads (20X) in both strands and minimum base quality of 25 were  
448 selected and classified based on their frequency in the sample as fixed (>90%) or low  
449 frequency (10–89%). InDels with less than 20X were discarded. SnpEff was used for  
450 SNP annotation using the H37Rv annotation reference (AL123456.2). Finally, SNPs  
451 falling in genes annotated as PE/PPE/PGRS, ‘maturase,’ ‘phage,’ ‘13E12 repeat family  
452 protein’; those located in insertion sequences; those within InDels or in higher density  
453 regions (>3 SNPs in 10 bp) were removed due to the uncertainty of mapping. Next,  
454 variants were compared with recently published catalogues with validated association  
455 between mutations and phenotypic resistance (Ngo and Teo, 2019) in order to predict  
456 high-confidence resistance profiles to first- and second-line drugs. Lineages were  
457 determined by comparing called SNPs with specific phylogenetic positions established  
458 (Coll et al., 2014; Stucki et al., 2016). An in-house R script was used to detect mixed  
459 infections based on the frequency of lineage- and sublineage-specific positions (López  
460 et al., 2020). Read files were deposited in the European Nucleotide Archive (ENA) under  
461 the bioproject numbers PRJEB29604 and PRJEB38719 (Supplemental Table 1).  
462 Sequences from two population-based studies in Oxfordshire (Walker et al., 2014), with  
463 92% of culture-positive cases sequenced, and Malawi (Guerra-Assunção et al., 2015),  
464 with 72% of culture-positive cases sequenced, were downloaded from ENA and  
465 analyzed as for the sequences generated in this study. All the custom scripts used are  
466 available in <https://gitlab.com/tbgenomicsunit>.

## 467 **Genomic clustering and phylogenetic analyses**

468 The pairwise SNP distance was computed with the R *ape* package. Genomic clusters  
469 were constructed if the genetic distance between at least two patients' isolates fell below  
470 a defined threshold. Cluster monophyly was confirmed in a maximum likelihood tree  
471 (50,184 SNPs).

472 Timed phylogenies were inferred with Beast v2.5.1 (Bouckaert et al., 2014). Ancient TB  
473 DNA (Bos et al., 2014) and samples from a recent Spanish outbreak were included as  
474 calibration data. Dating was performed using GTR + GAMMA substitution model, a strict  
475 molecular clock model, and a coalescent constant size demographic model, as  
476 previously described (López et al., 2020). Three independent runs of Markov Chain  
477 Monte-Carlo length chains of 10 million were performed. Adequate mixing, convergence  
478 and sufficient sampling were assessed in Tracer v1.6, after a 10% burn-in.

## 479 **Tracking local transmission events over time**

480 Transmission events were defined as nodes occurring over time phylogenies  
481 (Supplemental figure 6). The rationale for this approach is based on the assumption that  
482 if few pathogen mutations are expected to be observed during a host's infection, as is  
483 the case of *M. tuberculosis*, lineages split only at transmission (Hall et al., 2016). To  
484 estimate the number of local transmission events, all ancestral nodes were counted,  
485 including local-born tips occurring within 150 years before 2016.



## 486 **References**

- 487 Aiming for zero tuberculosis transmission in low-burden countries. 2017. . *The Lancet*  
488 *Respiratory Medicine* **5**:846–848.
- 489 Behr MA, Edelstein PH, Ramakrishnan L. 2019. Is infection life long? *BMJ* **367**:l5770.
- 490 Bjorn-Mortensen K, Soborg B, Koch A, Ladefoged K, Merker M, Lillebaek T, Andersen  
491 AB, Niemann S, Kohl TA. 2016. Tracing Mycobacterium tuberculosis transmission  
492 by whole genome sequencing in a high incidence setting: a retrospective  
493 population-based study in East Greenland. *Sci Rep* **6**:33180.
- 494 Bos KI, Harkins KM, Herbig A, Coscolla M, Weber N, Comas I, Forrest SA, Bryant JM,  
495 Harris SR, Schuenemann VJ, Campbell TJ, Majander K, Wilbur AK, Guichon RA,  
496 Wolfe Steadman DL, Cook DC, Niemann S, Behr MA, Zumarraga M, Bastida R,  
497 Huson D, Nieselt K, Young D, Parkhill J, Buikstra JE, Gagneux S, Stone AC, Krause  
498 J. 2014. Pre-Columbian mycobacterial genomes reveal seals as a source of New  
499 World human tuberculosis. *Nature*. doi:10.1038/nature13591
- 500 Bouckaert R, Heled J, Kühnert D, Vaughan T, Wu C-H, Xie D, Suchard MA, Rambaut A,  
501 Drummond AJ. 2014. BEAST 2: a software platform for Bayesian evolutionary  
502 analysis. *PLoS Comput Biol* **10**:e1003537.
- 503 Chen S, Zhou Y, Chen Y, Gu J. 2018. fastp: an ultra-fast all-in-one FASTQ  
504 preprocessor. *Bioinformatics* **34**:i884–i890.
- 505 Coll F, McNerney R, Guerra-Assunção JA, Glynn JR, Perdigão J, Viveiros M, Portugal I,  
506 Pain A, Martin N, Clark TG. 2014. A robust SNP barcode for typing Mycobacterium  
507 tuberculosis complex strains. *Nat Commun* **5**:4812.
- 508 Comas I, Coscolla M, Luo T, Borrell S, Holt KE, Kato-Maeda M, Parkhill J, Malla B, Berg  
509 S, Thwaites G, Yeboah-Manu D, Bothamley G, Mei J, Wei L, Bentley S, Harris SR,  
510 Niemann S, Diel R, Aseffa A, Gao Q, Young D, Gagneux S. 2013. Out-of-Africa  
511 migration and Neolithic coexpansion of Mycobacterium tuberculosis with modern  
512 humans. *Nat Genet* **45**:1176–1182.
- 513 Diel R, Kohl TA, Maurer FP, Merker M, Walter KM, Hannemann J, Nienhaus A, Supply  
514 P, Niemann S. 2019. Accuracy of whole-genome sequencing to determine recent

515 tuberculosis transmission: an 11-year population-based study in Hamburg,  
516 Germany. *Eur Respir J* **54**. doi:10.1183/13993003.01154-2019

517 Gardy JL, Johnston JC, Ho Sui SJ, Cook VJ, Shah L, Brodtkin E, Rempel S, Moore R,  
518 Zhao Y, Holt R, Varhol R, Birol I, Lem M, Sharma MK, Elwood K, Jones SJM,  
519 Brinkman FSL, Brunham RC, Tang P. 2011. Whole-genome sequencing and social-  
520 network analysis of a tuberculosis outbreak. *N Engl J Med* **364**:730–739.

521 Glaziou P. 2020. Predicted impact of the COVID-19 pandemic on global tuberculosis  
522 deaths in 2020. *medRxiv* 2020.04.28.20079582.

523 Glaziou P, Floyd K, Raviglione M. 2018. Trends in tuberculosis in the UK. *Thorax*.

524 Guerra-Assunção JA, Crampin AC, Houben R, Mzembe T, Mallard K, Coll F, Khan P,  
525 Banda L, Chiwaya A, Pereira RPA, McNerney R, Fine PEM, Parkhill J, Clark TG,  
526 Glynn JR. 2015. Large-scale whole genome sequencing of *M. tuberculosis* provides  
527 insights into transmission in a high prevalence area. *eLife*. doi:10.7554/elife.05166

528 Hall MD, Woolhouse MEJ, Rambaut A. 2016. Using genomics data to reconstruct  
529 transmission trees during disease outbreaks. *Rev Sci Tech* **35**:287–296.

530 Jajou R, de Neeling A, van Hunen R, de Vries G, Schimmel H, Mulder A, Anthony R, van  
531 der Hoek W, van Soolingen D. 2018. Epidemiological links between tuberculosis  
532 cases identified twice as efficiently by whole genome sequencing than conventional  
533 molecular typing: A population-based study. *PLoS One* **13**:e0195413.

534 Kamper-Jørgensen Z, Andersen AB, Kok-Jensen A, Bygbjerg IC, Andersen PH,  
535 Thomsen VO, Kamper-Jørgensen M, Lillebaek T. 2012. Clustered tuberculosis in a  
536 low-burden country: nationwide genotyping through 15 years. *J Clin Microbiol*  
537 **50**:2660–2667.

538 Koboldt DC, Zhang Q, Larson DE, Shen D, McLellan MD, Lin L, Miller CA, Mardis ER,  
539 Ding L, Wilson RK. 2012. VarScan 2: somatic mutation and copy number alteration  
540 discovery in cancer by exome sequencing. *Genome Res* **22**:568–576.

541 Li H. 2011. A statistical framework for SNP calling, mutation discovery, association  
542 mapping and population genetical parameter estimation from sequencing data.  
543 *Bioinformatics* **27**:2987–2993.

544 Li H, Durbin R. 2009. Fast and accurate short read alignment with Burrows-Wheeler  
545 transform. *Bioinformatics* **25**:1754–1760.

546 Lönnroth K, Migliori GB, Abubakar I, D'Ambrosio L, de Vries G, Diel R, Douglas P,  
547 Falzon D, Gaudreau M-A, Goletti D, González Ochoa ER, LoBue P, Matteelli A,  
548 Njoo H, Solovic I, Story A, Tayeb T, van der Werf MJ, Weil D, Zellweger J-P, Abdel

- 549 Aziz M, Al Lawati MRM, Aliberti S, Arrazola de Oñate W, Barreira D, Bhatia V, Blasi  
550 F, Bloom A, Bruchfeld J, Castelli F, Centis R, Chemtob D, Cirillo DM, Colorado A,  
551 Dadu A, Dahle UR, De Paoli L, Dias HM, Duarte R, Fattorini L, Gaga M, Getahun H,  
552 Glaziou P, Gogvadze L, Del Granado M, Haas W, Järvinen A, Kwon G-Y, Mosca D,  
553 Nahid P, Nishikiori N, Noguer I, O'Donnell J, Pace-Asciak A, Pompa MG, Popescu  
554 GG, Robalo Cordeiro C, Rønning K, Ruhwald M, Sculier J-P, Simunović A, Smith-  
555 Palmer A, Sotgiu G, Sulis G, Torres-Duque CA, Umeki K, Uplekar M, van  
556 Weezenbeek C, Vasankari T, Vitillo RJ, Voniatis C, Wanlin M, Raviglione MC. 2015.  
557 Towards tuberculosis elimination: an action framework for low-incidence countries.  
558 *Eur Respir J* **45**:928–952.
- 559 López MG, Dogba JB, Torres-Puente M, Goig GA, Moreno-Molina M, Villamayor LM,  
560 Cadmus S, Comas I. 2020. Tuberculosis in Liberia: high multidrug-resistance  
561 burden, transmission and diversity modelled by multiple importation events.  
562 *Microbial Genomics* **6**:e000325.
- 563 Mathema B, Andrews JR, Cohen T, Borgdorff MW, Behr M, Glynn JR, Rustomjee R, Silk  
564 BJ, Wood R. 2017. Drivers of Tuberculosis Transmission. *J Infect Dis* **216**:S644–  
565 S653.
- 566 McCreesh N, White RG. 2018. An explanation for the low proportion of tuberculosis that  
567 results from transmission between household and known social contacts. *Sci Rep*  
568 **8**:1–9.
- 569 McKenna A, Hanna M, Banks E, Sivachenko A, Cibulskis K, Kernytsky A, Garimella K,  
570 Altshuler D, Gabriel S, Daly M, DePristo MA. 2010. The Genome Analysis Toolkit: a  
571 MapReduce framework for analyzing next-generation DNA sequencing data.  
572 *Genome Res* **20**:1297–1303.
- 573 Meehan CJ, Goig GA, Kohl TA, Verboven L, Dippenaar A, Ezewudo M, Farhat MR,  
574 Guthrie JL, Laukens K, Miotto P, Ofori-Anyinam B, Dreyer V, Supply P, Suresh A,  
575 Utpatel C, van Soolingen D, Zhou Y, Ashton PM, Brites D, Cabibbe AM, de Jong  
576 BC, de Vos M, Menardo F, Gagneux S, Gao Q, Heupink TH, Liu Q, Loiseau C,  
577 Rigouts L, Rodwell TC, Tagliani E, Walker TM, Warren RM, Zhao Y, Zignol M,  
578 Schito M, Gardy J, Cirillo DM, Niemann S, Comas I, Van Rie A. 2019. Whole  
579 genome sequencing of Mycobacterium tuberculosis : current standards and open  
580 issues. *Nat Rev Microbiol* **17**:533–545.
- 581 Menzies NA, Cohen T, Hill AN, Yaesoubi R, Galer K, Wolf E, Marks SM, Salomon JA.  
582 2018. Prospects for Tuberculosis Elimination in the United States: Results of a

583 Transmission Dynamic Model. *Am J Epidemiol* **187**:2011–2020.

584 Ngo T-M, Teo Y-Y. 2019. Genomic prediction of tuberculosis drug-resistance:  
585 benchmarking existing databases and prediction algorithms. *BMC Bioinformatics*  
586 **20**:1–9.

587 Nikolayevskyy V, Kranzer K, Niemann S, Drobniewski F. 2016. Whole genome  
588 sequencing of *Mycobacterium tuberculosis* for detection of recent transmission and  
589 tracing outbreaks: A systematic review. *Tuberculosis* **98**:77–85.

590 Roetzer A, Diel R, Kohl TA, Rückert C, Nübel U, Blom J, Wirth T, Jaenicke S, Schuback  
591 S, Rüscher-Gerdes S, Supply P, Kalinowski J, Niemann S. 2013. Whole genome  
592 sequencing versus traditional genotyping for investigation of a *Mycobacterium*  
593 tuberculosis outbreak: a longitudinal molecular epidemiological study. *PLoS Med*  
594 **10**:e1001387.

595 Role and value of whole genome sequencing in studying tuberculosis transmission.  
596 2019. . *Clin Microbiol Infect* **25**:1377–1382.

597 Stucki D, Brites D, Jeljeli L, Coscolla M, Liu Q, Trauner A, Fenner L, Rutaiwa L, Borrell  
598 S, Luo T, Gao Q, Kato-Maeda M, Ballif M, Egger M, Macedo R, Mardassi H, Moreno  
599 M, Tundo Vilanova G, Fyfe J, Globan M, Thomas J, Jamieson F, Guthrie JL, Asante-  
600 Poku A, Yeboah-Manu D, Wampande E, Ssengooba W, Joloba M, Henry Boom W,  
601 Basu I, Bower J, Saraiva M, Vaconcellos SEG, Suffys P, Koch A, Wilkinson R, Gail-  
602 Bekker L, Malla B, Ley SD, Beck H-P, de Jong BC, Toit K, Sanchez-Padilla E,  
603 Bonnet M, Gil-Brusola A, Frank M, Penlap Beng VN, Eisenach K, Alani I, Wangui  
604 Ndung'u P, Revathi G, Gehre F, Akter S, Ntoumi F, Stewart-Isherwood L, Ntinginya  
605 NE, Rachow A, Hoelscher M, Cirillo DM, Skenders G, Hoffner S, Bakonyte D,  
606 Stakenas P, Diel R, Crudu V, Moldovan O, Al-Hajoj S, Otero L, Barletta F, Jane  
607 Carter E, Diero L, Supply P, Comas I, Niemann S, Gagneux S. 2016.  
608 *Mycobacterium tuberculosis* lineage 4 comprises globally distributed and  
609 geographically restricted sublineages. *Nat Genet* **48**:1535–1543.

610 Surie D, Fane O, Finlay A, Ogopotse M, Tobias JL, Click ES, Modongo C, Zetola NM,  
611 Moonan PK, Oeltmann JE. n.d. Molecular, Spatial, and Field Epidemiology  
612 Suggesting TB Transmission in Community, Not Hospital, Gaborone, Botswana -  
613 Volume 23, Number 3—March 2017 - Emerging Infectious Diseases journal - CDC.  
614 doi:10.3201/eid2303.161183

615 The transmission of *Mycobacterium tuberculosis* in high burden settings. 2016. . *Lancet*  
616 *Infect Dis* **16**:227–238.

- 617 Walker TM, Lalor MK, Broda A, Ortega LS, Morgan M, Parker L, Churchill S, Bennett K,  
618 Golubchik T, Giess AP, Del Ojo Elias C, Jeffery KJ, Bowler ICJW, Laurenson IF,  
619 Barrett A, Drobniewski F, McCarthy ND, Anderson LF, Abubakar I, Thomas HL,  
620 Monk P, Smith EG, Walker AS, Crook DW, Peto TEA, Conlon CP. 2014.  
621 Assessment of Mycobacterium tuberculosis transmission in Oxfordshire, UK, 2007-  
622 12, with whole pathogen genome sequences: an observational study. *Lancet Respir*  
623 *Med* **2**:285–292.
- 624 Whole-genome sequencing to delineate Mycobacterium tuberculosis outbreaks: a  
625 retrospective observational study. 2013. . *Lancet Infect Dis* **13**:137–146.
- 626 Wood DE, Salzberg SL. 2014. Kraken: ultrafast metagenomic sequence classification  
627 using exact alignments. *Genome Biol* **15**:1–12.
- 628 Xu Y, Cancino-Muñoz I, Torres-Puente M, Villamayor LM, Borrás R, Borrás-Máñez M,  
629 Bosque M, Camarena JJ, Colomer-Roig E, Colomina J, Escribano I, Esparcia-  
630 Rodríguez O, Gil-Brusola A, Gimeno C, Gimeno-Gascón A, Gomila-Sard B,  
631 González-Granda D, Gonzalo-Jiménez N, Guna-Serrano MR, López-Hontangas JL,  
632 Martín-González C, Moreno-Muñoz R, Navarro D, Navarro M, Orta N, Pérez E, Prat  
633 J, Rodríguez JC, Ruiz-García MM, Vanaclocha H, Colijn C, Comas I. 2019. High-  
634 resolution mapping of tuberculosis transmission: Whole genome sequencing and  
635 phylogenetic modelling of a cohort from Valencia Region, Spain. *PLoS Med*  
636 **16**:e1002961.
- 637 Yang C, Lu L, Warren JL, Wu J, Jiang Q, Zuo T, Gan M, Liu M, Liu Q, DeRiemer K,  
638 Hong J, Shen X, Colijn C, Guo X, Gao Q, Cohen T. 2018. Internal migration and  
639 transmission dynamics of tuberculosis in Shanghai, China: an epidemiological,  
640 spatial, genomic analysis. *Lancet Infect Dis* **18**:788–795.
